# Supplementary material for: Stress Induced Polarization of Immune-Neuroendocrine Phenotypes in Gallus gallus
Source: PubMed Central journal article supplement (PMC5556001; doi:10.1038/s41598-017-08733-0), 2017-08-14
Supplement: 41598_2017_8733_MOESM1_ESM.pdf [file 41598_2017_8733_MOESM1_ESM.pdf]

Stress Induced Polarization of Immune-Neuroendocrine Phenotypes in *Gallus gallus*.

**Authors.**

F. Nicolas Nazar\*, Inma Estevez, Silvia G. Correa and Raul H. Marin.

**Supplementary information.**

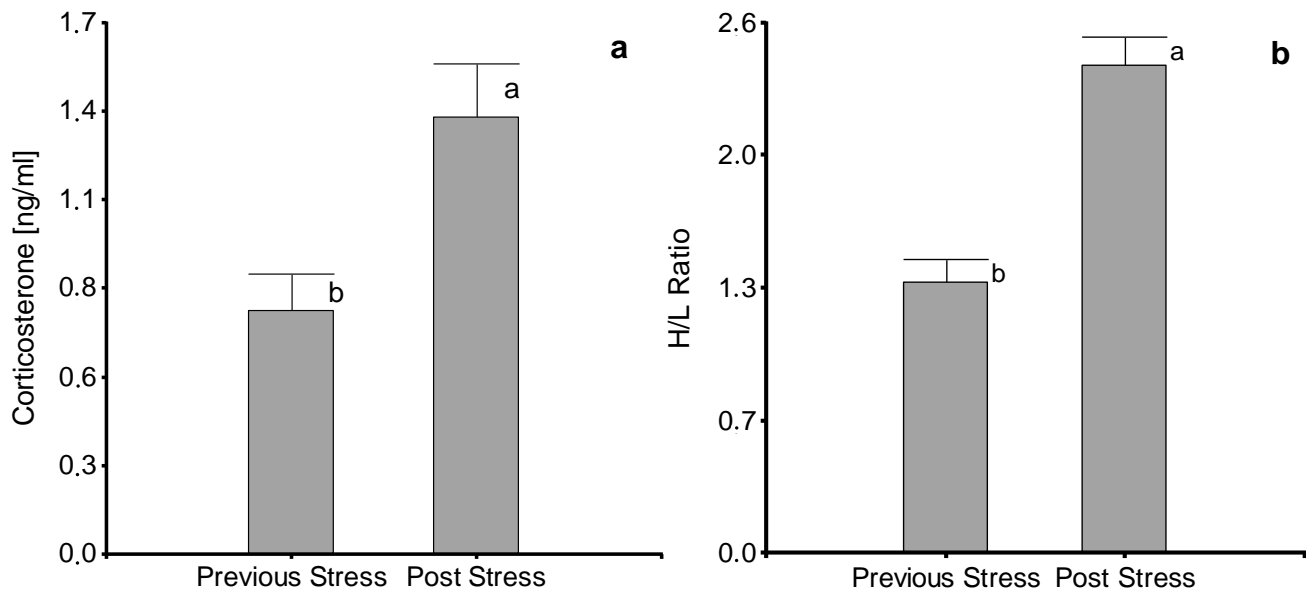

**Supplementary Fig. S1.** Effect of social chronic stress challenge on (a) Corticosterone concentration and (b) Heterophil/Lymphocyte (H/L) ratio. Different letters indicate significant ( $p < 0.05$ ) differences between groups. Data are means  $\pm$  SE. Number of birds per group: Previous Stress = 67, Post-Stress = 65. H/L ratio was calculated using the following formula:  $H/L = \text{number of heterophils} / \text{number of lymphocytes}$ .

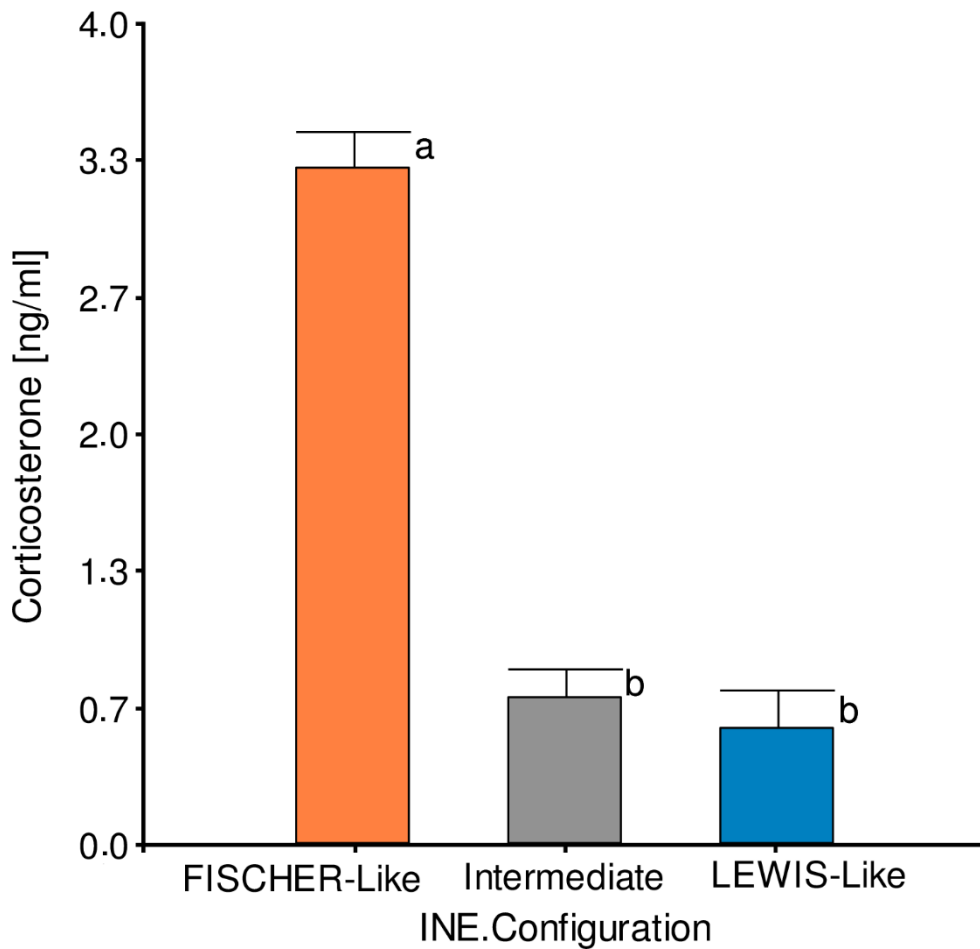

**Supplementary Fig. S2. Intermediate, LEWIS-Like, FISCHER-Like groups' basal CORT concentration.**

Effect of post stress clustering on basal CORT concentration. Low and High CORT birds were identified according to their hormonal concentration. Data are means  $\pm$  SE. Different letters indicate significant ( $p < 0.05$ ) differences between groups. Number of birds in the study = 65; number of birds per group: Low CORT = 17, High CORT = 18, Intermediate = 30.

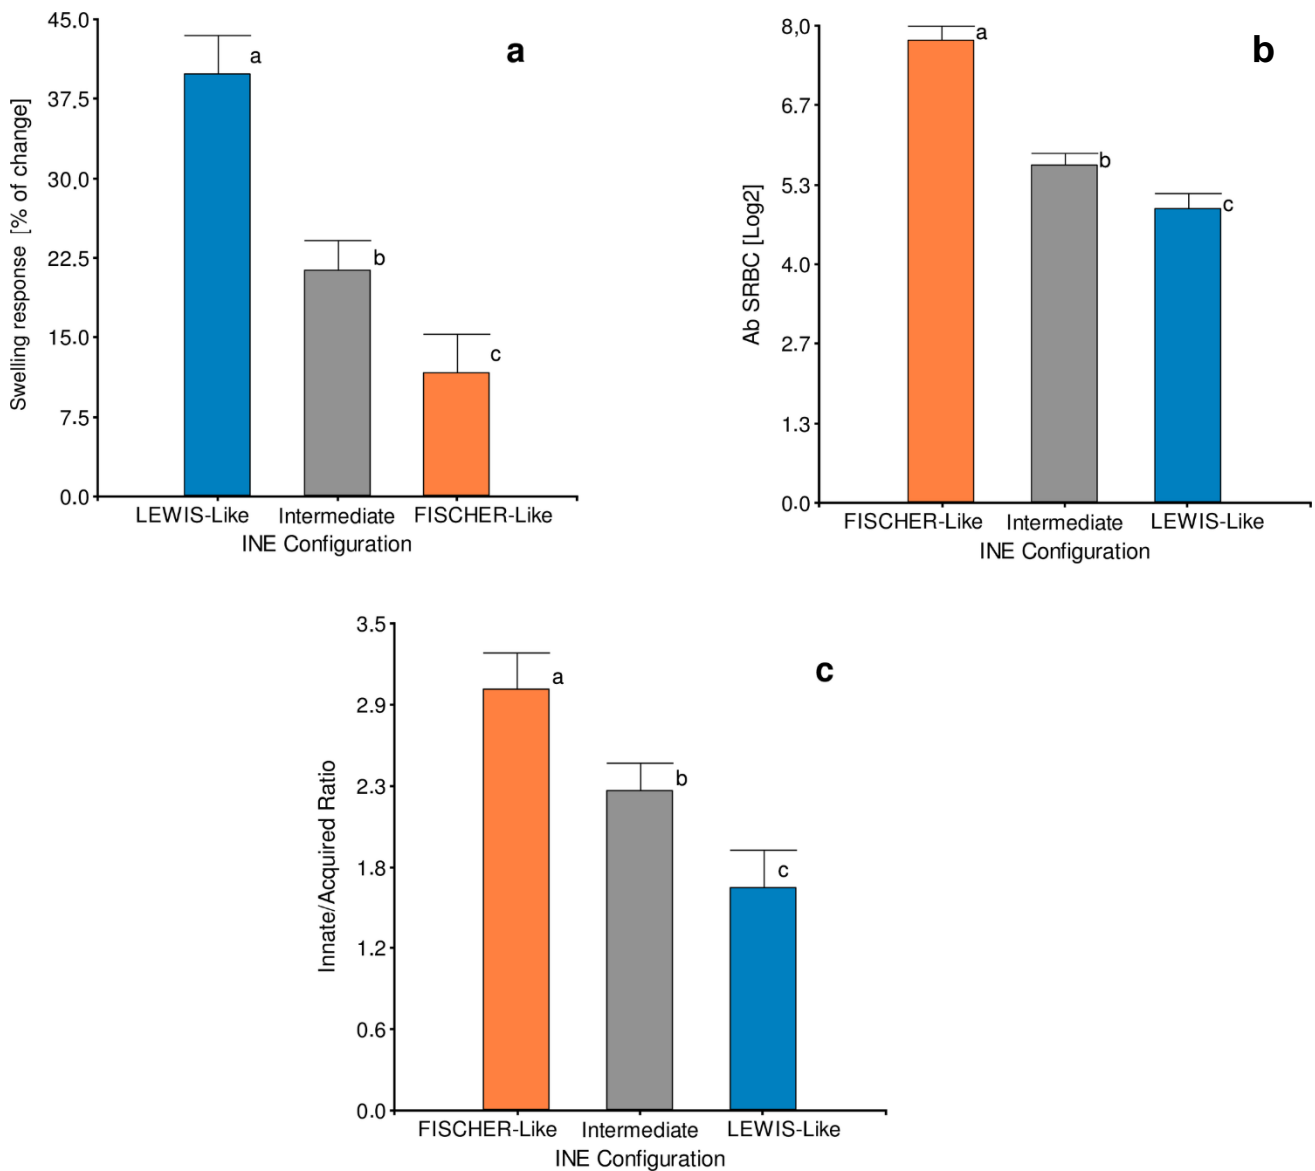

**Supplementary Fig. S3. Immune effector analysis in Intermediate, LEWIS-Like, FISCHER-Like groups.**

Effect of post stress clustering on immune effectors is shown in (a) swelling response to PHA-P, (b) antibody response against SRBC and (c) Innate/Acquired ratio. Different letters indicate significant ( $p < 0.05$ ) differences between groups. Data are means  $\pm$  SE. Number of birds per group: LEWIS-Like = 17, FISCHER-Like = 18, Intermediate = 30. INN/ACQ ratio was calculated using the following formula:  $INN/ACQ = (\text{number of basophils} + \text{number of heterophils} + \text{number of monocytes}) / (\text{number of eosinophils} + \text{number of lymphocytes})$ .

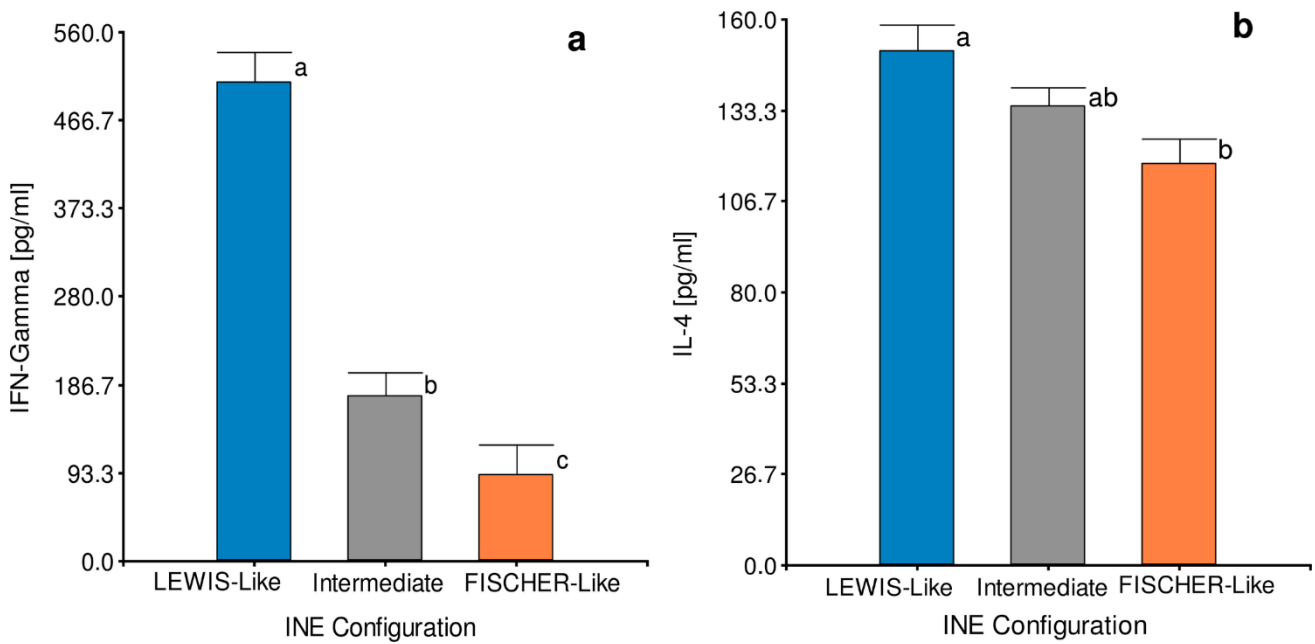

**Supplementary Fig. S4. Analysis of molecular mediators in Intermediate, LEWIS-Like, FISCHER-Like groups.**

Effect of post stress clustering on the expression of (a) anti-inflammatory IL-4 and (b) pro-inflammatory IFN- $\gamma$  mediators. Data are adjusted means  $\pm$  SE. Different letters indicate significant ( $p < 0.05$ ) differences between groups. Number of birds per group: LEWIS-Like = 17, FISCHER-Like = 18, Intermediate = 30.

**a**

| <b>Principal component</b> | <b>Eigenvalue</b> | <b>Cumulative EV</b> |
|----------------------------|-------------------|----------------------|
| <b>1</b>                   | 0.4               | 0.4                  |
| <b>2</b>                   | 0.18              | 0.58                 |
| <b>3</b>                   | 0.14              | 0.72                 |
| <b>4</b>                   | 0.12              | 0.83                 |
| <b>5</b>                   | 0.09              | 0.93                 |
| <b>6</b>                   | 0.07              | 1                    |

**b**

| <b>Variable</b>                     | <b>Eigenvector 1</b> | <b>Eigenvector 2</b> |
|-------------------------------------|----------------------|----------------------|
| <b>Corticosterone concentration</b> | 0.49                 | 0.08                 |
| <b>Swelling response</b>            | -0.43                | 0.51                 |
| <b>Ab against SRBC</b>              | 0.30                 | 0.36                 |
| <b>Innate / Acquired ratio</b>      | 0.43                 | 0.33                 |
| <b>IL-4</b>                         | -0.41                | 0.56                 |
| <b>IFN-<math>\gamma</math></b>      | -0.38                | -0.42                |

**Supplementary Table. S5.** Principal component analyses before social chronic stress disruption. Eigenvalues (a) and eigenvectors (b) for Principal Component Analyses used to graphically represent the results of the clustering in a multivariate manner, using the 6 clustering variables as explanatory variables.

**a**

| <b>Principal component</b> | <b>Eigenvalue</b> | <b>Cumulative EV</b> |
|----------------------------|-------------------|----------------------|
| <b>1</b>                   | 0.41              | 0.41                 |
| <b>2</b>                   | 0.18              | 0.59                 |
| <b>3</b>                   | 0.14              | 0.73                 |
| <b>4</b>                   | 0.12              | 0.85                 |
| <b>5</b>                   | 0.09              | 0.94                 |
| <b>6</b>                   | 0.06              | 1                    |

**b**

| <b>Variable</b>                     | <b>Eigenvector 1</b> | <b>Eigenvector 2</b> |
|-------------------------------------|----------------------|----------------------|
| <b>Corticosterone concentration</b> | 0.53                 | 0.02                 |
| <b>Swelling response</b>            | -0.35                | 0.52                 |
| <b>Ab against SRBC</b>              | 0.51                 | -0.14                |
| <b>Innate / Acquired ratio</b>      | 0.33                 | 0.27                 |
| <b>IL-4</b>                         | -0.23                | 0.79                 |
| <b>IFN-<math>\gamma</math></b>      | -0.42                | 0.08                 |

**Supplementary Table. S6.** Principal component analyses after social chronic stress disruption. Eigenvalues (a) and eigenvectors (b) for Principal Component Analyses used to graphically represent the results of the clustering in a multivariate manner, using the 6 clustering variables as explanatory variables.
